# Supplementary material for: Ti(Phen)(OC2H5)2Cl2: a highly efficient pre-catalyst for selective oxidation of organic sulfides to sulfoxides by hydrogen peroxide
Source: Royal Society of Chemistry journal article supplement (doi:10.1039/c7ra06883b), 2017-01-01
Supplement: c7ra06883b1.pdf [file c7ra06883b1.pdf]

## Electronic Supporting Information(ESI)

for

### **Ti(Phen)(OC<sub>2</sub>H<sub>5</sub>)<sub>2</sub>Cl<sub>2</sub>: a highly efficient catalyst for selective oxidation of organic sulfides to sulfoxides by hydrogen peroxide**

Rong-Hui Wu, <sup>a,b</sup> Jing Wu, <sup>a</sup> Ming-Xin Yu <sup>a</sup> and Long-Guan Zhu <sup>\*a</sup>

*<sup>a</sup> Department of Chemistry, Zhejiang University, Hangzhou 310027, People's Republic of China.*

*<sup>b</sup> Key Laboratory of Chemical Utilization of Forestry Biomass of Zhejiang Province, Zhejiang A & F University, Lin'an, Zhejiang Province, 311300, China.*

---

\* To whom correspondence should be addressed

E-mail: [chezlg@zju.edu.cn](mailto:chezlg@zju.edu.cn) (L. G. Zhu).

**Table S1 Ti(Phen)(OC<sub>2</sub>H<sub>5</sub>)<sub>2</sub>Cl<sub>2</sub> catalyzed oxidation of organic sulfides with H<sub>2</sub>O<sub>2</sub> in CH<sub>3</sub>OH or CH<sub>3</sub>CH<sub>2</sub>OH solvent <sup>a</sup>**

| Entry | Substrate                                                                         | Time (min) | CH <sub>3</sub> OH                    | CH <sub>3</sub> CH <sub>2</sub> OH    |
|-------|-----------------------------------------------------------------------------------|------------|---------------------------------------|---------------------------------------|
|       |                                                                                   |            | Conv. (%) / Sele. (%) <sup>b, c</sup> | Conv. (%) / Sele. (%) <sup>b, c</sup> |
| 1     | 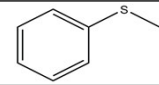 | 20         | 100 / 96                              | 100 / 95                              |
| 2     |  | 50         | 96 / 99                               | 100 / 94                              |
| 3     |  | 65         | 99 / 97                               | 99 / 92                               |
| 4     |  | 45         | 98 / 96                               | 100 / 90                              |
| 5     |  | 360        | 98 / 92                               | 99 / 82                               |

<sup>a</sup> Reaction conditions: 1.00 mmol of sulfides, 1.00 mmol of 30% H<sub>2</sub>O<sub>2</sub>, 2.5\*10<sup>-3</sup>mmol Ti catalyst, in CH<sub>3</sub>OH or CH<sub>3</sub>CH<sub>2</sub>OH solution (5 mL) at 25°C. Products were quantified by GC analysis and characterized by GC-MS.

<sup>b</sup> The GC yields (%) are measured relative to the starting sulfide.

<sup>c</sup> Selectivity to sulfoxides, the byproduct was sulfone.

**Table S2 Crystallographic data and refinement parameters for complex 1**

|                                                        | 1                                                                               |
|--------------------------------------------------------|---------------------------------------------------------------------------------|
| Empirical formula                                      | C <sub>16</sub> H <sub>18</sub> N <sub>2</sub> O <sub>2</sub> TiCl <sub>2</sub> |
| Mr                                                     | 389.12                                                                          |
| Crystal system                                         | Triclinic                                                                       |
| Space group                                            | P -1                                                                            |
| Size(mm <sup>3</sup> )                                 | 0.42×0.32×0.26                                                                  |
| habit/color                                            | Block/Colorless                                                                 |
| a(Å)                                                   | 9.0551(7)                                                                       |
| b(Å)                                                   | 9.1409(7)                                                                       |
| c(Å)                                                   | 11.4606(8)                                                                      |
| α(°)                                                   | 105.286(7)                                                                      |
| β(°)                                                   | 90.508(6)                                                                       |
| γ(°)                                                   | 104.462(7)                                                                      |
| V(Å <sup>3</sup> )                                     | 883.22(27)                                                                      |
| Z                                                      | 2                                                                               |
| Dc(Mg·m <sup>-3</sup> )                                | 1.463                                                                           |
| μ(mm <sup>-1</sup> )                                   | 0.796                                                                           |
| θ range                                                | 3.2-25.1                                                                        |
| Unique reflections                                     | 3127                                                                            |
| Observed reflections                                   | 1924                                                                            |
| parameters                                             | 210                                                                             |
| F(000)                                                 | 399.9                                                                           |
| T(K)                                                   | 293(2)                                                                          |
| R <sub>1</sub> wR <sub>2</sub> [I>2σ(I)]               | 0.059, 0.139                                                                    |
| R <sub>1</sub> wR <sub>2</sub> [alldata]               | 0.102, 0.174                                                                    |
| GOF                                                    | 1.048                                                                           |
| Largest peak and hole(e <sup>-</sup> Å <sup>-3</sup> ) | 0.370, -0.260                                                                   |

**Table S3 Selected bond lengths (Å) and angles (°) for complex 1**

| Lengths     |            |            |            |
|-------------|------------|------------|------------|
| Ti1-O1      | 1.788(4)   | Ti1-O2     | 1.761(3)   |
| Ti1-N1      | 2.249(4)   | Ti1-N2     | 2.251(4)   |
| Ti1-Cl1     | 2.4009(13) | Ti1-Cl2    | 2.3519(13) |
| Angles      |            |            |            |
| O1-Ti1-O2   | 105.06(18) | O1-Ti1-N2  | 162.80(16) |
| O2-Ti1-N2   | 91.43(16)  | O1-Ti1-N1  | 90.74(16)  |
| O2-Ti1-N1   | 163.23(15) | N2-Ti1-N1  | 72.40(14)  |
| O1-Ti1-Cl1  | 92.92(11)  | O2-Ti1-Cl1 | 90.58(11)  |
| N2-Ti1-Cl1  | 81.91(9)   | N1-Ti1-Cl1 | 82.92(9)   |
| O1-Ti1-Cl2  | 97.20(11)  | O2-Ti1-Cl2 | 97.86(11)  |
| N2-Ti1-Cl2  | 85.07(10)  | N1-Ti1-Cl2 | 85.42(10)  |
| Cl1-Ti1-Cl2 | 164.65(6)  |            |            |

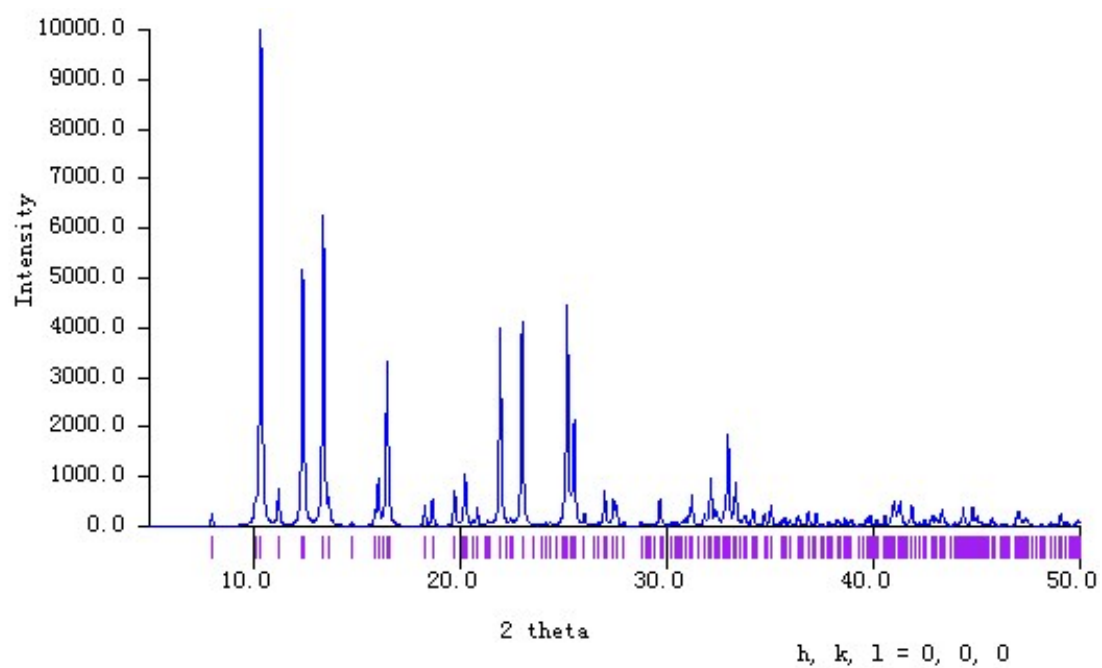

**Figure S1.** The calculated XRD pattern from single crystal data of complex 1.

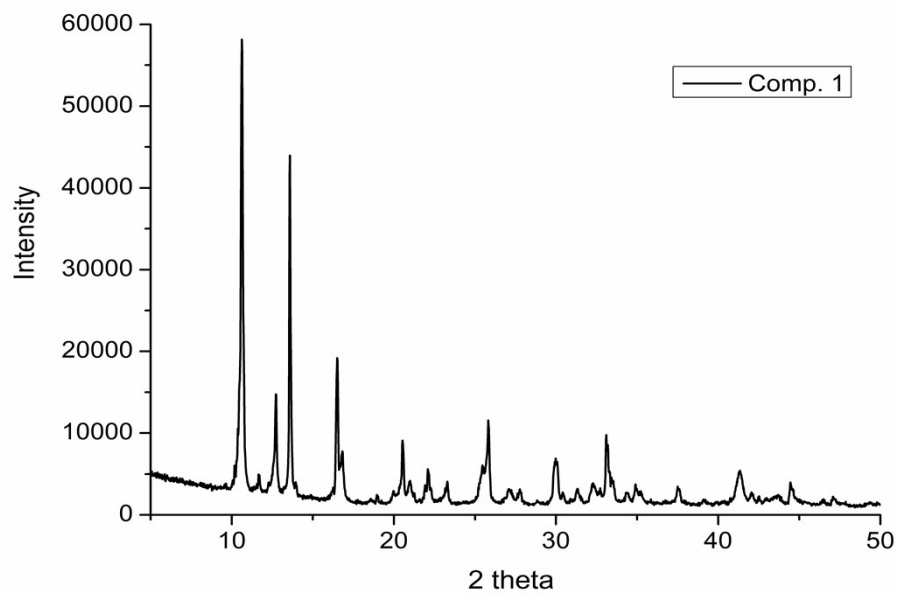

**Figure S2.** The powder XRD pattern for complex 1.

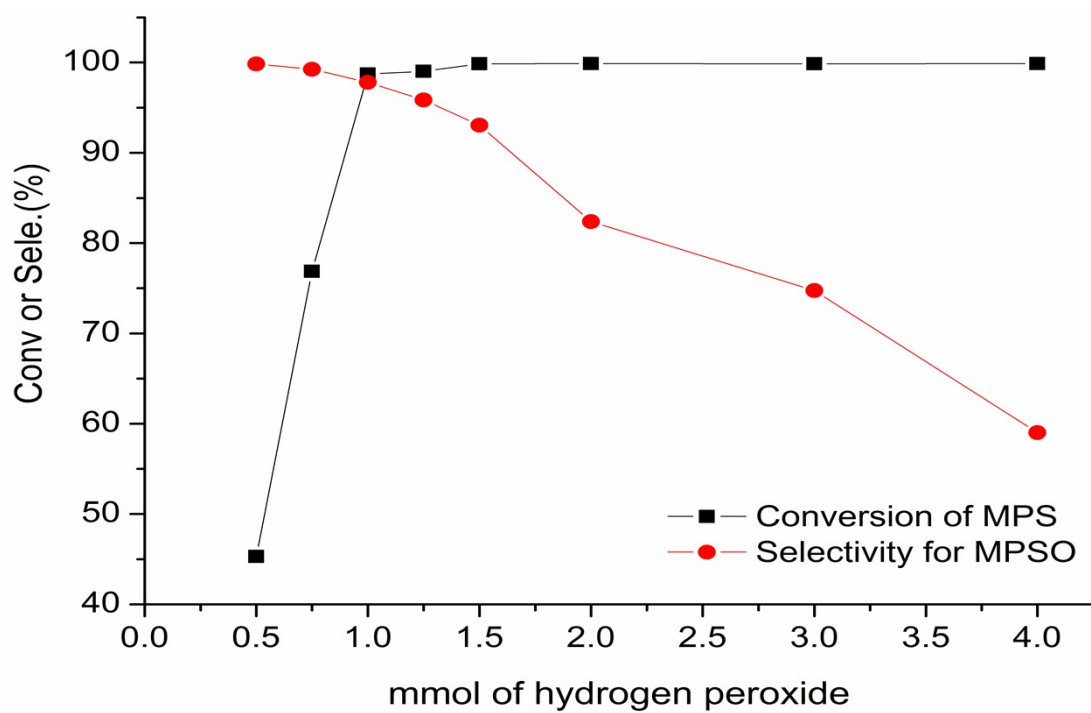

**Figure S3.** A hydrogen peroxide amount dependent profile of the oxidation of MPS by complex 1, the reactions were run for 20 min at 25 °C.

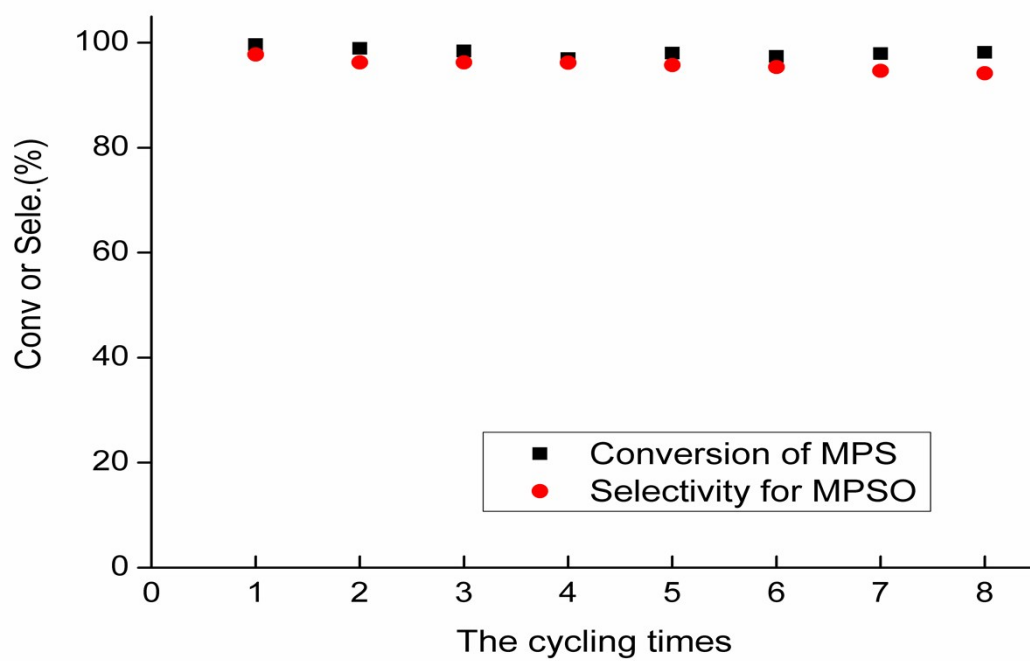

**Figure S4. Catalytic activity of eight repetition cycles for complex 1**



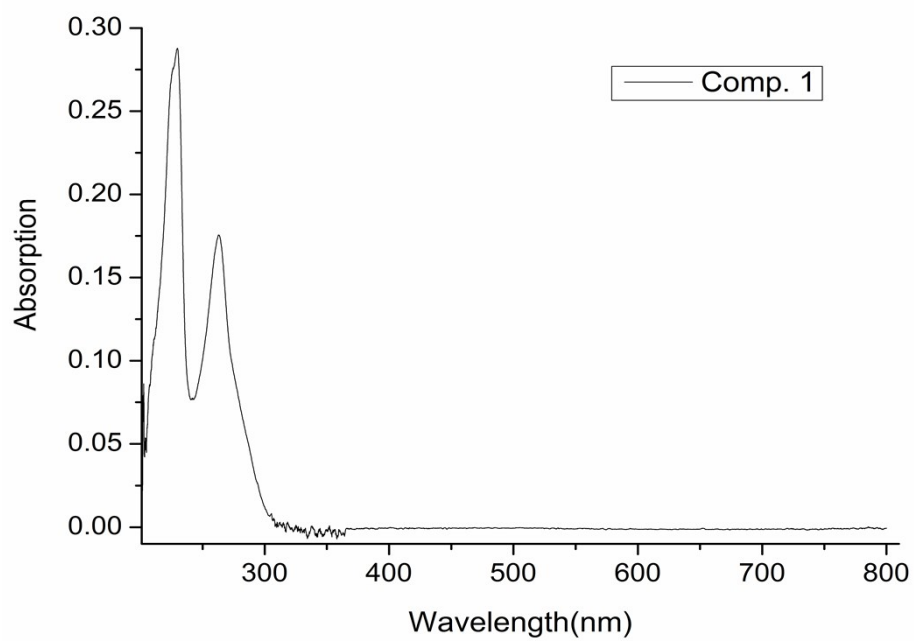

**Figure S5. The UV-vis spectra of complex 1 in CH<sub>3</sub>OH**

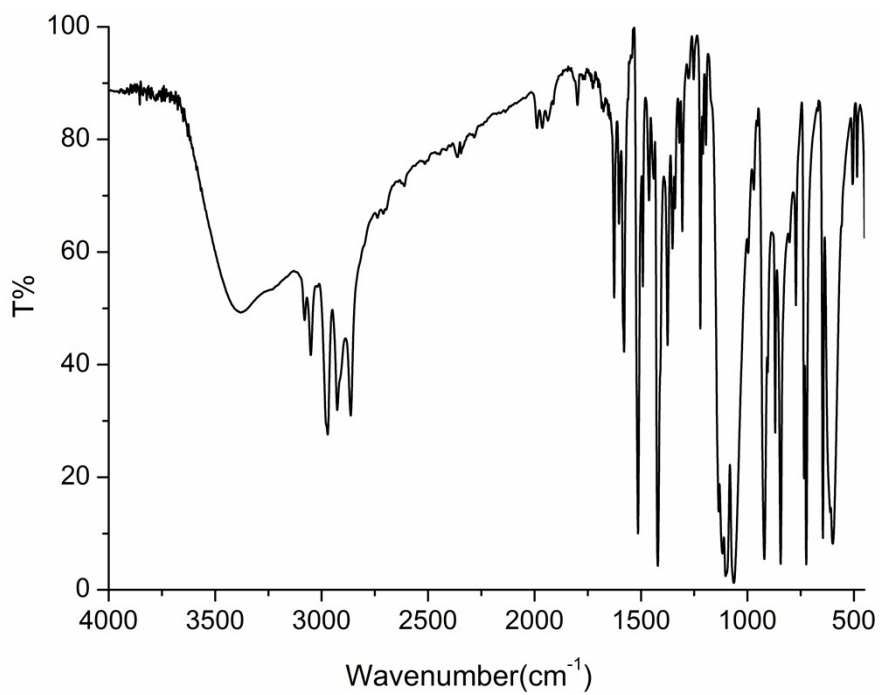

**Figure S6.** The IR spectrum of of complex 1.

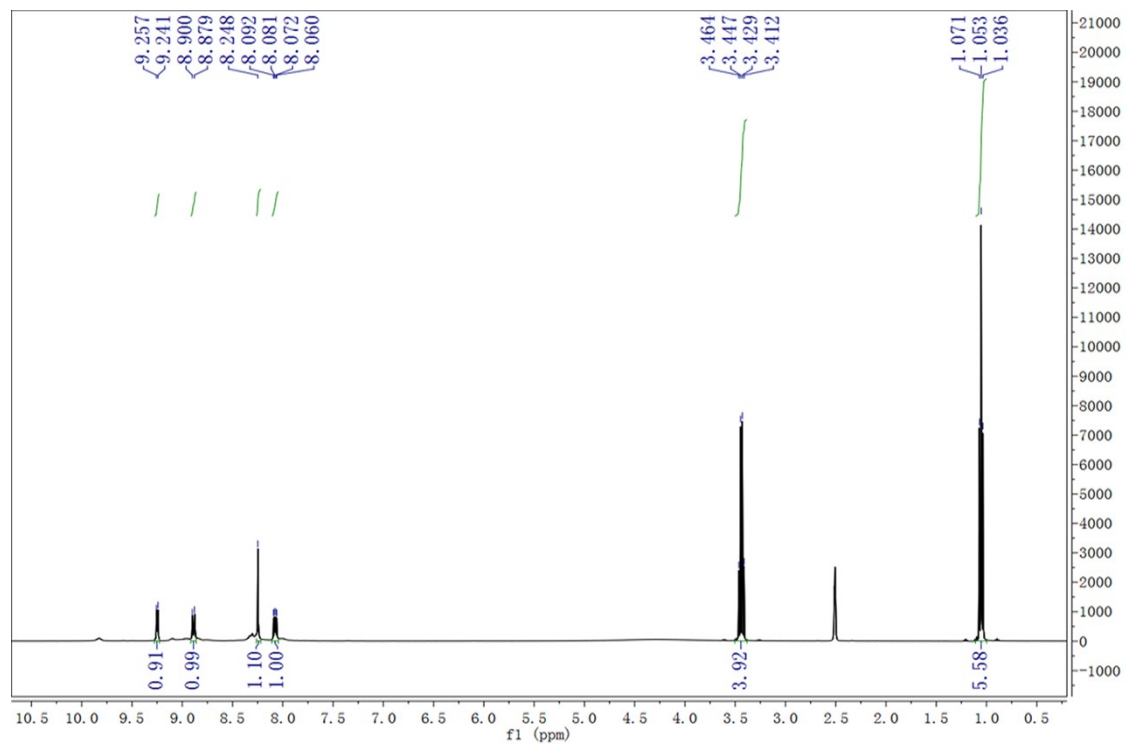

**Figure S7.** The  $^1\text{H}$  NMR spectra of complex 1

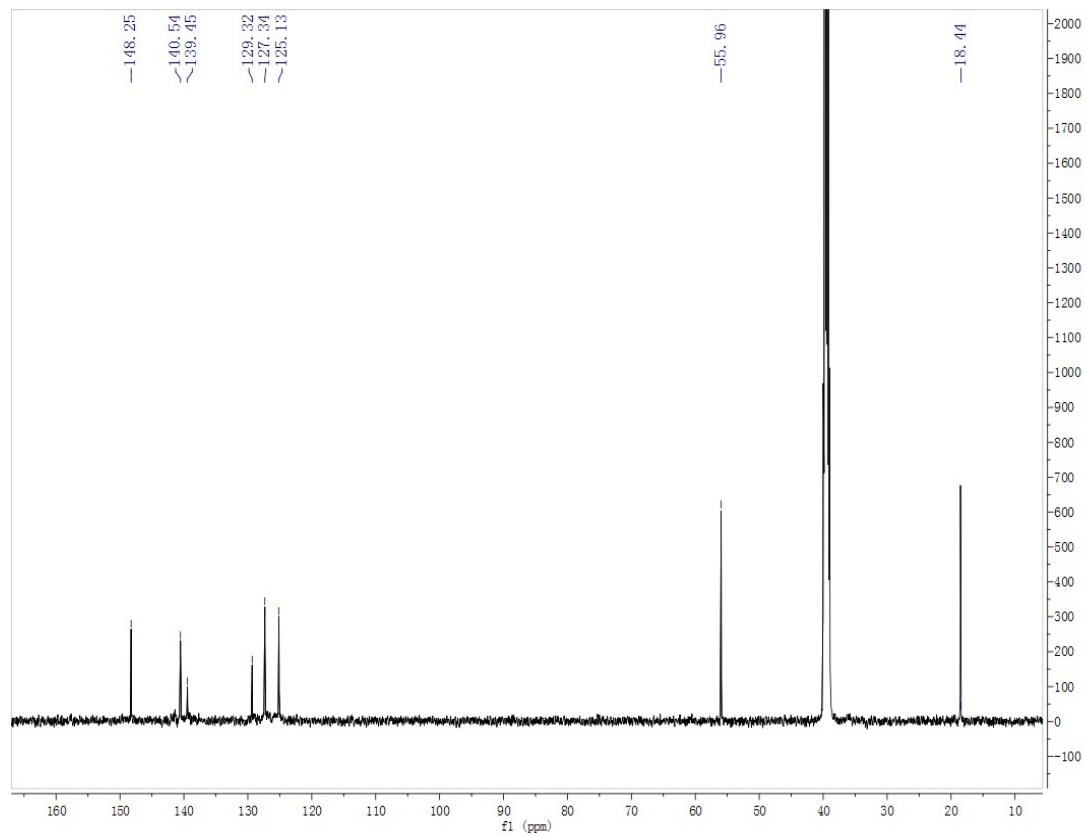

**Figure S8.** The  $^{13}\text{C}$  NMR spectra of complex 1
